# Supplementary material for: Air Pollution and Chronic Kidney Disease Risk in Oil and Gas- Situated Communities: A Systematic Review and Meta-Analysis
Source: PubMed Central journal article supplement (PMC9035494; doi:10.3389/ijph.2022.1604522), 2022-04-11
Supplement: DataSheet1.pdf [file DataSheet1.pdf]

## Ogo - A Systematic Review of the Epidemiological Literature Assessing Kidney-related Health Outcomes among Residents of Oil and Gas Situated Communities.

### Medline and CINAHL, CAB Abstracts and Greenfile databases - combined search [EBSCO search platform]

- Go to my Libguide <https://libguides.napier.ac.uk/shsc>
- Select **Medline** from the left hand menu. Log in if asked with your student ID and password.
- Go to **Choose Databases** above the search boxes.
- Tick **all** these databases : **Medline** (the main medical database), **CINAHL** (the main nursing database), **CAB Abstracts** (environment) and **Greenfile** (environmental database)
- Type in the search as given below, including the punctuation.

### Search 1 CKD + pollution + Africa

*renal insufficiency chronic OR chronic kidney disease OR kidney failure OR end stage renal disease*

*AND*

*Particles OR "particulate matter" OR "sulfur dioxide" OR "sulphur dioxide" OR "nitrogen oxide" OR "nitrogen dioxide" OR "carbon monoxide" OR "ozone" OR air OR gas OR oil or petroleum*

*AND*

*pollut\**

*AND*

*africa OR sub saharan africa OR global OR low income OR middle income OR developing countries*

New Search Subjects Publications Images Indexes

EBSCOhost Searching: MEDLINE, Show all | Choose Databases

renal insufficiency chronic OR chronic kidney disea Select a Field (optional) Search

AND Particles OR "particulate matter" OR "sulfur Select a Field (optional) Clear ?

AND pollut\* Select a Field (optional)

AND africa OR sub saharan africa OR global sou Select a Field (optional) + -

Basic Search Advanced Search Search History

Refine Results Search Results: 1 - 10 of 17

This gives 17 results. Scan the titles and abstracts.

## Search 2

As search 1 but change the last line (geographic search terms) to the word "global" only

New Search Subjects Publications Images Indexes

EBSCOhost Searching: MEDLINE, Show all | Choose Databases

renal insufficiency chronic OR chronic kidney disea Select a Field (optional) Search

AND Particles OR "particulate matter" OR "sulfur Select a Field (optional) Clear ?

AND pollut\* Select a Field (optional)

AND global Select a Field (optional) + -

Basic Search Advanced Search Search History

Refine Results Search Results: 1 - 10 of 29

This gives 29 results. Scan the titles and abstracts.

## Search 3 CKD + pollutants

Remove the last line from Search 1 (geographic search terms)

New Search Subjects Publications Images Indexes

EBSCOhost Searching: MEDLINE, Show all | Choose Databases

renal insufficiency chronic OR chronic kidney disea Select a Field (optional) Search

AND particles OR "particulate matter" OR "sulfur Select a Field (optional) Clear ?

AND pollut\* Select a Field (optional) + -

Basic Search Advanced Search Search History

Refine Results Search Results: 1 - 10 of 190

This gives 190 results. Scan the titles and abstracts

## Search 4 NCD + pollutants

Remove CKD search terms

New Search Subjects Publications Images Indexes

EBSCOhost Searching: MEDLINE, Show all Choose Databases

chronic noncommunicable diseases OR noncomr Select a Field (optional) Search

AND Particles OR "particulate matter" OR "sulfu Select a Field (optional) Clear ?

AND pollut\* Select a Field (optional) + -

Basic Search Advanced Search Search History

---

Refine Results Search Results: 1 - 10 of 264

This gives 264 results. Scan the titles and abstracts
